# Supplementary material
Source: MDPI journal article supplement (https://www.mdpi.com/2073-4344/11/12/1433)
Supplement: s1 [file s1]

---

## Electronic Supplementary Materials

### **Plasma Promotes Dry Reforming Reaction of CH<sub>4</sub> and CO<sub>2</sub> at Room Temperature with Highly Dispersed NiO/ $\gamma$ -Al<sub>2</sub>O<sub>3</sub> Catalyst**

Shan-Shan Lin <sup>1,2</sup>, Peng-Rui Li <sup>1,2</sup>, Hui-Bo Jiang <sup>1,2</sup>, Jian-Feng Diao <sup>2,\*</sup>, Zhong-Ning Xu,<sup>2,\*</sup>  
and Guo-Cong Guo <sup>2</sup>

<sup>1</sup> College of Chemical Engineering, Fuzhou University, Fuzhou 350116, China

<sup>2</sup> State Key Laboratory of Structural Chemistry, Fujian Institute of Research on the Structure of Matter, Chinese Academy of Sciences, Fuzhou 350002, China

\* Correspondence: diaojianfeng@fjirsm.ac.cn (J.-F.D.); znxu@fjirsm.ac.cn (Z.-N.X.)

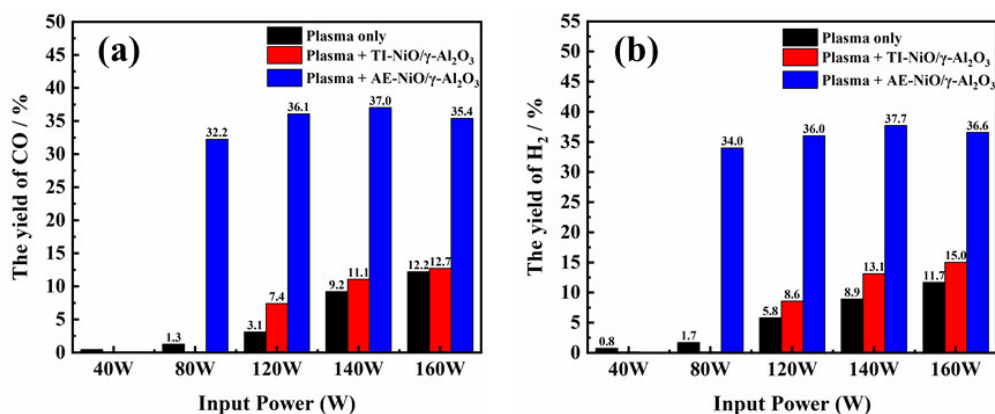

**Figure S1.** Effect of different reaction modes on the performance of the plasma dry reforming reaction: (a) yield of CO, (b) yield of H<sub>2</sub>. (CO<sub>2</sub>/CH<sub>4</sub> = 1 : 1, total feed flow rate 20 mL/min, 600 mg catalyst, room temperature and ambient pressure).

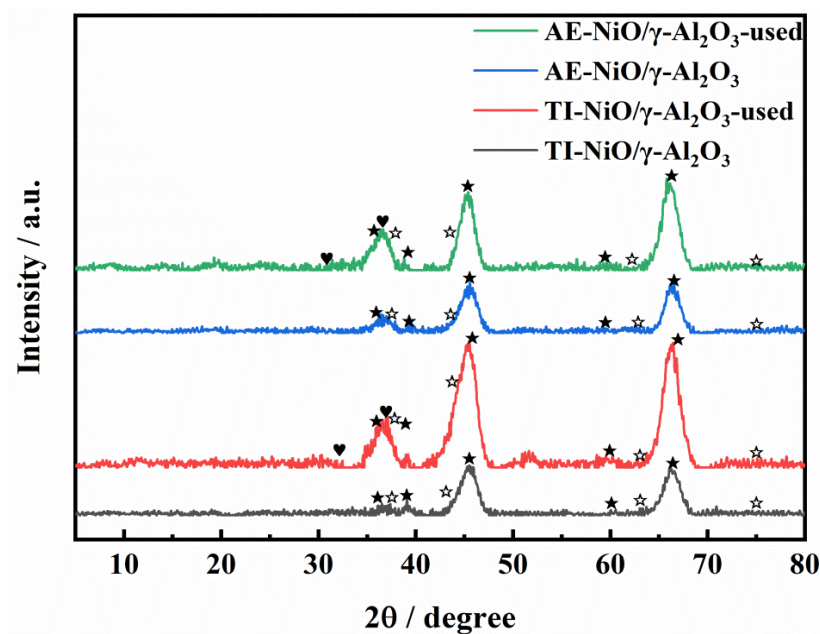

**Figure S2.** PXRD patterns of AE-NiO/ $\gamma$ -Al<sub>2</sub>O<sub>3</sub>-used, TI-NiO/ $\gamma$ -Al<sub>2</sub>O<sub>3</sub>-used (☆NiO, ★ $\gamma$ -Al<sub>2</sub>O<sub>3</sub>, ♥NiAl<sub>2</sub>O<sub>4</sub>).

It can be seen from the Figure S2 that the diffraction peaks of AE-Ni/ $\gamma$ -Al<sub>2</sub>O<sub>3</sub>-used and TI-Ni/ $\gamma$ -Al<sub>2</sub>O<sub>3</sub>-used around 37 ° were significantly enhanced, but no obvious carbon diffraction peak was found, which may be attributed to the formation of NiAl<sub>2</sub>O<sub>4</sub> ( $2\theta = 31.406^\circ$ ,  $2\theta = 31.406^\circ$ , PDF # 10-0339). That also means that during the reaction, NiO interacted with the support  $\gamma$ -Al<sub>2</sub>O<sub>3</sub> to form a NiAl<sub>2</sub>O<sub>4</sub> spinel. In addition, no obvious diffraction peaks of Ni or NiO were observed, which proved that NiO was not sintered or cluster after the reaction.

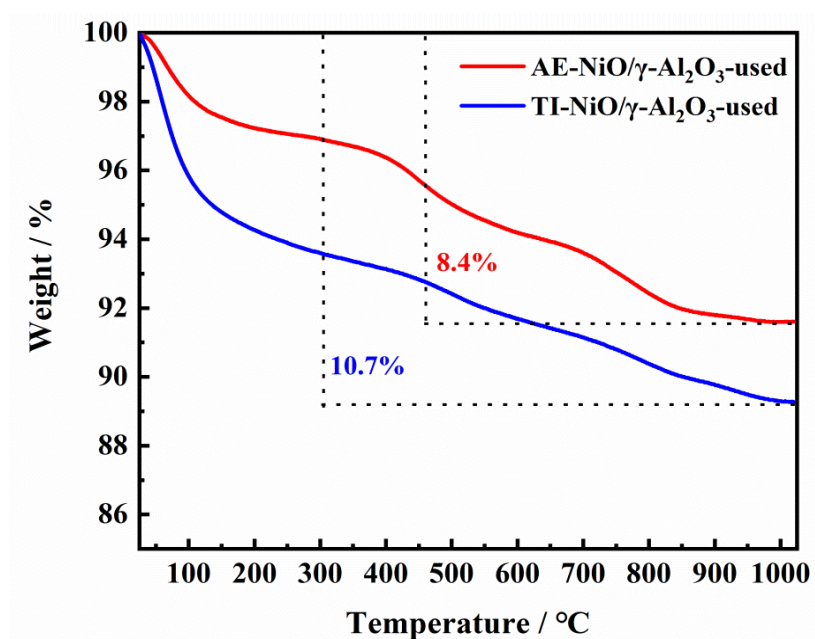

**Figure S3.** TG results of AE-Ni/ $\gamma$ -Al<sub>2</sub>O<sub>3</sub>-used and TI-Ni/ $\gamma$ -Al<sub>2</sub>O<sub>3</sub>-used.

Figure S3 shows the TG results of AE-Ni/ $\gamma$ -Al<sub>2</sub>O<sub>3</sub>-used and TI-Ni/ $\gamma$ -Al<sub>2</sub>O<sub>3</sub>-used. Obviously, the loss of AE-Ni/ $\gamma$ -Al<sub>2</sub>O<sub>3</sub>-used is less than TI-Ni/ $\gamma$ -Al<sub>2</sub>O<sub>3</sub>-used. By combining the EDX results in Figure S4, it can be obtained that carbon is formed on the catalyst after the reaction. As shown in

---

Figure S3, the weight loss of AE-Ni/ $\gamma$ -Al<sub>2</sub>O<sub>3</sub>-used is less than the weight loss of TI-Ni/ $\gamma$ -Al<sub>2</sub>O<sub>3</sub>-used, indicating that the ability to resist carbon deposition of AE-Ni/ $\gamma$ -Al<sub>2</sub>O<sub>3</sub> is higher than TI-Ni/ $\gamma$ -Al<sub>2</sub>O<sub>3</sub>.

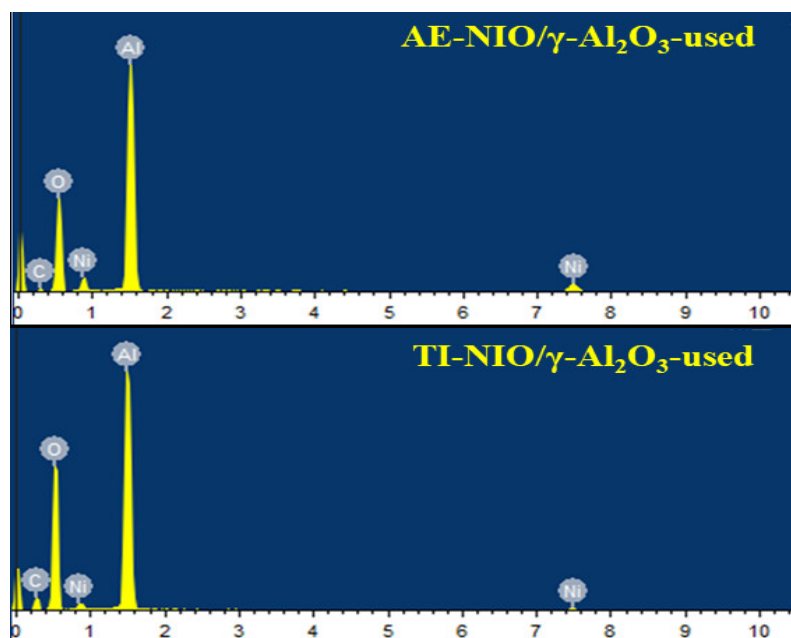

**Figure S4.** EDX results of AE-NiO/ $\gamma$ -Al<sub>2</sub>O<sub>3</sub>-used and TI-NiO/ $\gamma$ -Al<sub>2</sub>O<sub>3</sub>-used.

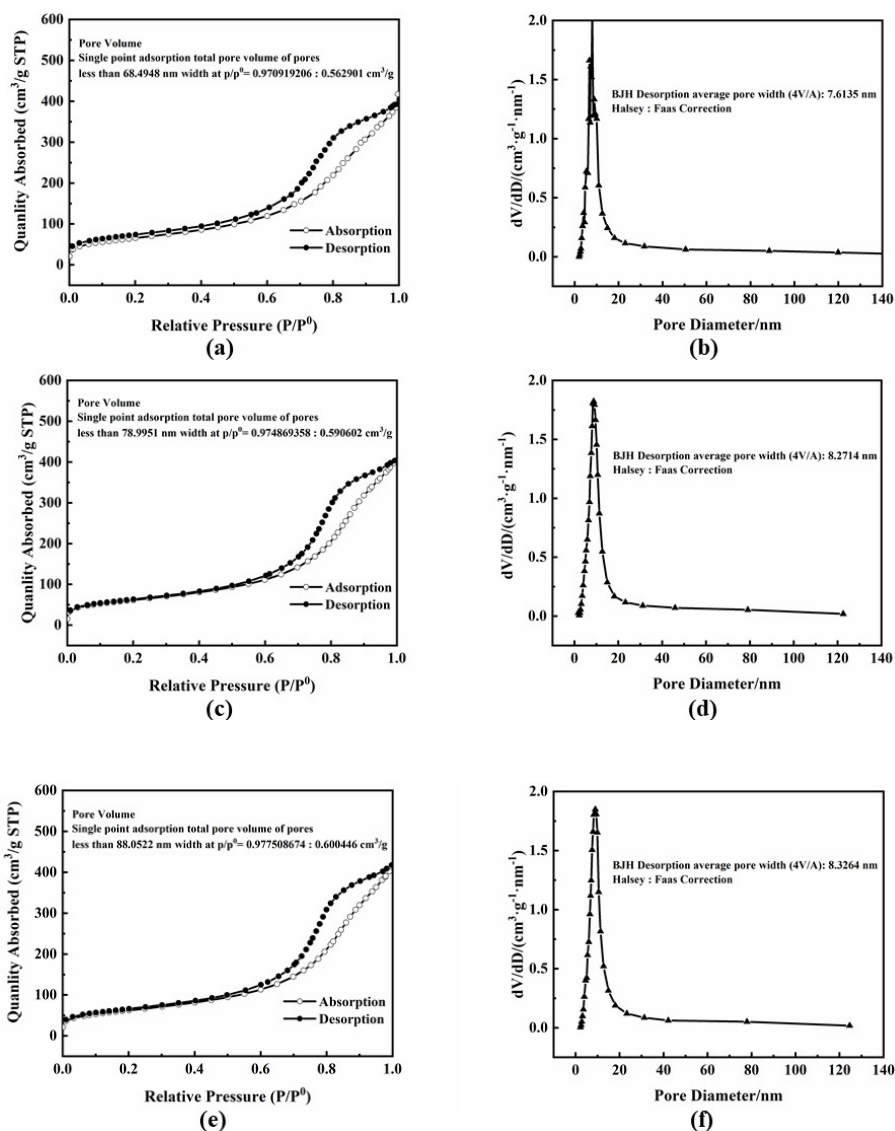

**Figure S5.** (a) Nitrogen adsorption isotherms of  $\gamma$ -Al<sub>2</sub>O<sub>3</sub>, (b) BJH desorption average pore size distribution of  $\gamma$ -Al<sub>2</sub>O<sub>3</sub>, (c) Nitrogen adsorption isotherms of AE-NiO/ $\gamma$ -Al<sub>2</sub>O<sub>3</sub>, (d) BJH desorption average pore size distribution of AE-NiO/ $\gamma$ -Al<sub>2</sub>O<sub>3</sub>, (e) Nitrogen adsorption isotherms of TI-NiO/ $\gamma$ -Al<sub>2</sub>O<sub>3</sub>, (f) BJH desorption average pore size distribution of TI-NiO/ $\gamma$ -Al<sub>2</sub>O<sub>3</sub>.

---

**Table S1.** Input Power, Output Power (Discharge Power) and Efficiency.

| Input Power(W) | Output Power(W) | Efficiency( $\eta$ , %) |
|----------------|-----------------|-------------------------|
| 40             | 36.4            | 91.1                    |
| 80             | 64.7            | 80.8                    |
| 120            | 92.7            | 77.3                    |
| 140            | 132.1           | 94.4                    |
| 160            | 147.6           | 92.2                    |

---

Table S1 lists the input power and discharge power calculated by the Lissa-jous graphic method. The discharge efficiency is calculated by

$$Efficiency(\eta) = \frac{Output\ Power}{Input\ Power} \times 100\%.$$
